# Supplementary material for: Optically Active TiO2:Er Thin Films Deposited by Magnetron Sputtering
Source: MDPI journal article supplement (doi:10.3390/ma14154085), 2021-07-22
Supplement: s1 [file s1]

# Optically Active TiO<sub>2</sub>:Er Thin Films Deposited by Magnetron Sputtering

Anna Kot <sup>1,\*</sup>, Marta Radecka <sup>1</sup>, Dominik Dorosz <sup>1</sup> and Katarzyna Zakrzewska <sup>2</sup>

<sup>1</sup> Faculty of Materials Science and Ceramics, AGH University of Science and Technology, al. A. Mickiewicza 30, 30-059 Kraków, Poland; radecka@agh.edu.pl (M.R.); ddorosz@agh.edu.pl (D.D.)

<sup>2</sup> Faculty of Computer Science, Electronics and Telecommunications, AGH University of Science and Technology, al. A. Mickiewicza 30, 30-059 Kraków, Poland; zak@agh.edu.pl

\* Correspondence: annakot@agh.edu.pl

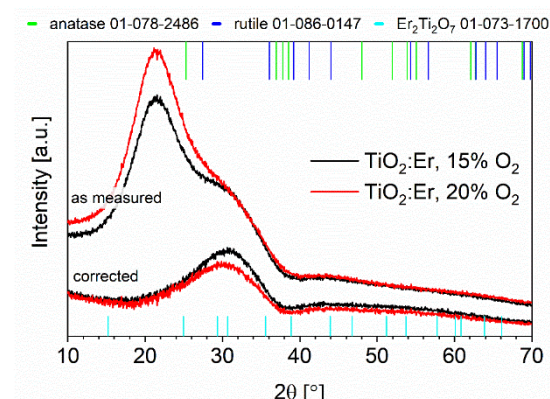

**Figure S1.** XRD patterns (as measured and after correction) recorded for the Er-doped thin films deposited at 15% O<sub>2</sub> (black curve) and 20% O<sub>2</sub> (red curve). Correction was done by subtraction of recorded substrate pattern. Positions of reference peaks are marked with vertical lines. Reference patterns are from anatase 01-078-2486, rutile 01-086-0147, and Er<sub>2</sub>Ti<sub>2</sub>O<sub>7</sub> 01-073-1700 cards.

**Citation:** Kot, A.; Radecka, M.; Dorosz, D.; Zakrzewska, K. Optically Active TiO<sub>2</sub>:Er Thin Films Deposited by Magnetron Sputtering. *Materials* **2021**, *14*, 4085. <https://doi.org/10.3390/ma14154085>

Academic Editor: Roberta G. Toro

Received: 15 June 2021

Accepted: 14 July 2021

Published: 22 July 2021

**Publisher's Note:** MDPI stays neutral with regard to jurisdictional claims in published maps and institutional affiliations.

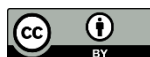

**Copyright:** © 2021 by the authors. Licensee MDPI, Basel, Switzerland. This article is an open access article distributed under the terms and conditions of the Creative Commons Attribution (CC BY) license (<http://creativecommons.org/licenses/by/4.0/>).

Table S1. Grain size analysis.

|                      | 15% O <sub>2</sub>                                                                   | 20% O <sub>2</sub>                                                                    |
|----------------------|--------------------------------------------------------------------------------------|---------------------------------------------------------------------------------------|
| TiO <sub>2</sub>     | 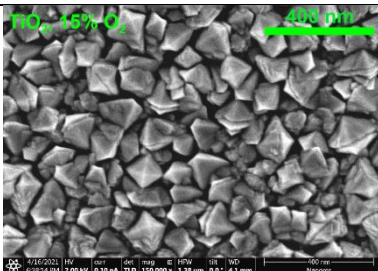   |    |
|                      |    |    |
|                      | N total                                                                              | 321                                                                                   |
|                      | Mean                                                                                 | 92.44 nm                                                                              |
|                      | Standard deviation                                                                   | 34.97 nm                                                                              |
|                      | Average grain size                                                                   | 92±35 nm                                                                              |
| TiO <sub>2</sub> :Er |  |  |
|                      |  |  |
|                      | N total                                                                              | 351                                                                                   |
|                      | Mean                                                                                 | 13.61 nm                                                                              |
|                      | Standard deviation                                                                   | 4.11 nm                                                                               |
|                      | Average grain size                                                                   | 14±4 nm                                                                               |

**Table S2.** XPS results analysis.

|                                          | Peak position (eV) | Area   | FWHM |
|------------------------------------------|--------------------|--------|------|
| TiO <sub>2</sub> , 20% O <sub>2</sub>    |                    |        |      |
| Ti <sup>3+</sup> : 2p <sub>3/2</sub>     | 457.6              | 237.0  | 2.73 |
| Ti <sup>3+</sup> : 2p <sub>1/2</sub>     | 462.7              | 71.6   | 1.45 |
| Ti <sup>4+</sup> : 2p <sub>3/2</sub>     | 458.6              | 2594.3 | 0.96 |
| Ti <sup>4+</sup> : 2p <sub>1/2</sub>     | 464.3              | 2060.4 | 2.34 |
| TiO <sub>2</sub> :Er, 20% O <sub>2</sub> |                    |        |      |
| Ti <sup>3+</sup> : 2p <sub>3/2</sub>     | 457.3              | 38.6   | 1.13 |
| Ti <sup>3+</sup> : 2p <sub>1/2</sub>     | 462.7              | 18.0   | 0.96 |
| Ti <sup>4+</sup> : 2p <sub>3/2</sub>     | 458.5              | 1211.0 | 1.00 |
| Ti <sup>4+</sup> : 2p <sub>1/2</sub>     | 464.3              | 856.5  | 2.38 |
| Er <sup>3+</sup> : 4d <sub>5/2</sub>     | 168.3              | 190.8  | 1.46 |
| Er <sup>3+</sup> : 4d <sub>3/2</sub>     | 170.1              | 343.3  | 3.04 |

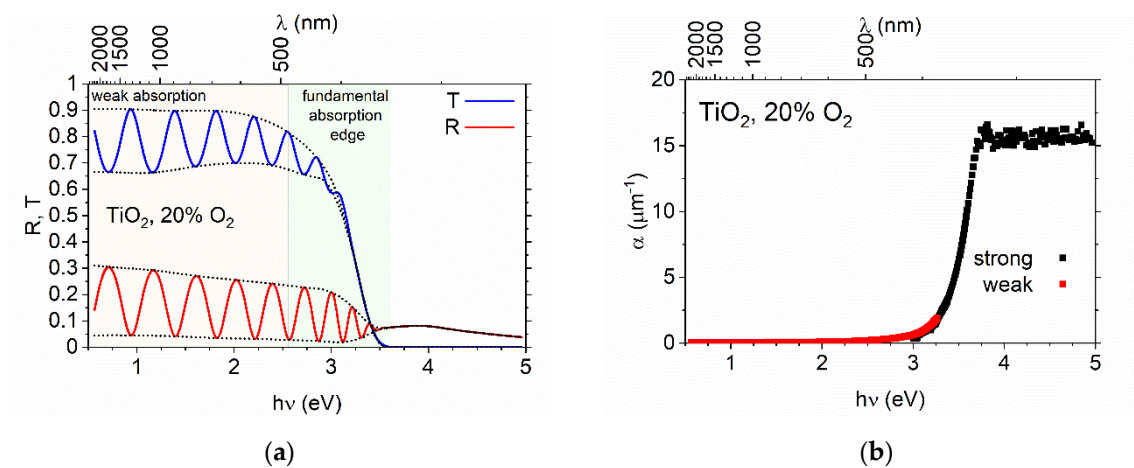**Figure S2.** Optical properties analysis of TiO<sub>2</sub> thin films deposited at 20% O<sub>2</sub> - spectral dependence of: (a) the transmittance T and reflectance R coefficients with envelopes; (b) the calculated absorption coefficient α.
